# Supplementary material
Source: PubMed Central journal article supplement (PMC6429630)
Supplement: DC181574SupplementaryData.pdf [file DC181574SupplementaryData.pdf]

SUPPLEMENTARY DATA

**Supplementary Figure S1.** Smoothing curves for the association between current HbA1c (%) and current insulin dose (units/kg/day) by DCCT treatment group during A) DCCT, B) EDIC years 1-20, and C) EDIC years 11-20. Black lines represent conventional treatment; Grey lines represent intensive treatment.

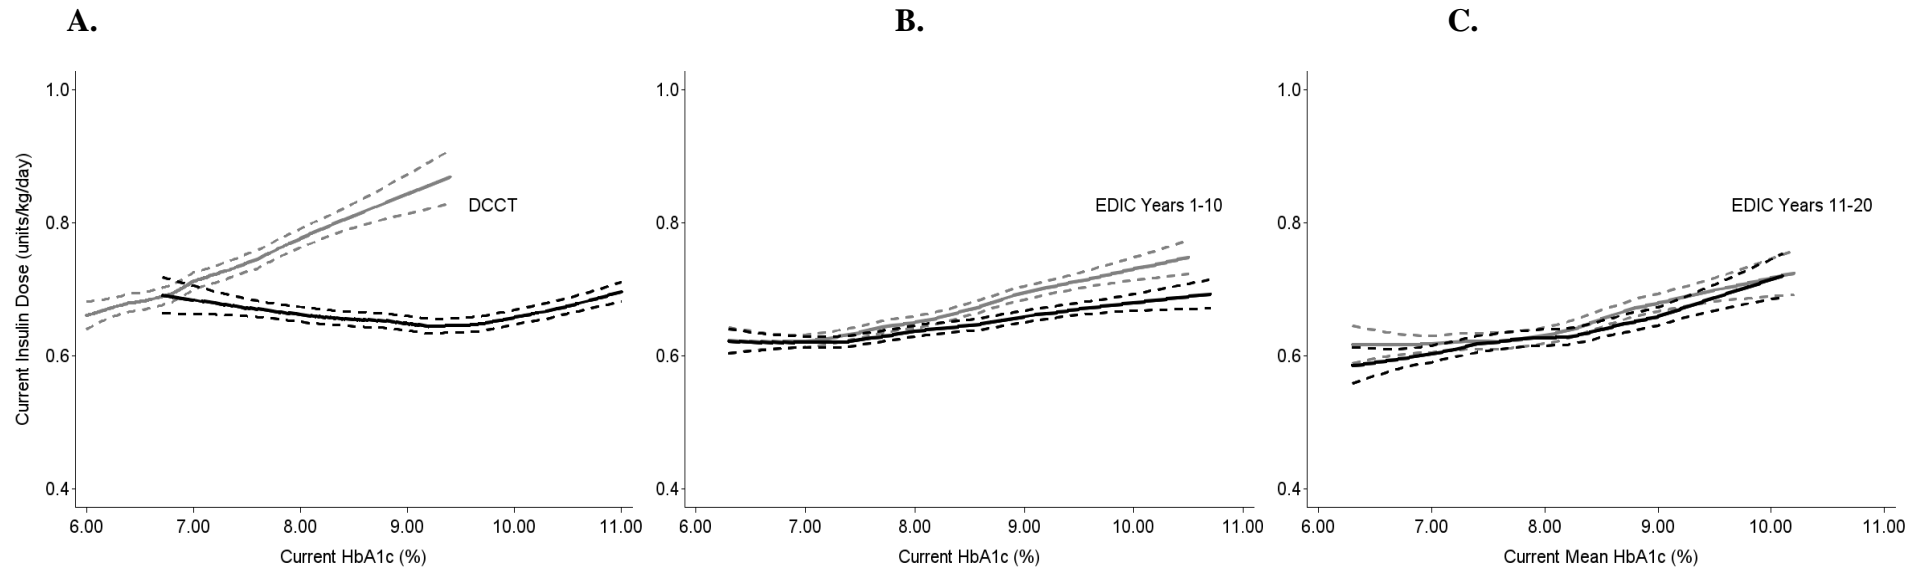

Smoothing curves for the association between current HbA1c (%) and current insulin dose (units/kg/day) by treatment group during A) DCCT, B) EDIC years 1-10, and C) EDIC years 11-20. Black lines represent conventional treatment; Grey lines represent intensive treatment.
